# Supplementary material for: Extracellular vimentin interacts with insulin-like growth factor 1 receptor to promote axonal growth
Source: PubMed Central journal article supplement (PMC4501001; doi:10.1038/srep12055), 2015-07-14
Supplement: srep12055-s1.pdf [file srep12055-s1.pdf]

## Supplementary Information

**Title: Extracellular vimentin interacts with insulin-like growth factor 1 receptor to promote axonal growth**

Michiko Shigyo<sup>1</sup>, Tomoharu Kuboyama<sup>1</sup>, Yusuke Sawai<sup>2</sup>, Masahito Tada-Umezaki<sup>2</sup> & Chihiro Tohda<sup>1\*</sup>

<sup>1</sup>Division of Neuromedical Sciences, Institute of Natural Medicine, University of Toyama, 2630 Sugitani, Toyama 930-0194, Japan

<sup>2</sup>Division of International Cooperative Research, Research Center for Ethnomedicine, Institute of Natural Medicine, University of Toyama, 2630, Sugitani, Toyama 930-0194, Japan

\*Corresponding author: Chihiro Tohda, Ph.D.

Division of Neuromedical Sciences, Institute of Natural Medicine, University of Toyama, 2630 Sugitani, Toyama 930-0194, Japan

Tel: +81-76-434-7646

Fax: +81-76-434-7646

E-mail: [chihiro@inm.u-toyama.ac.jp](mailto:chihiro@inm.u-toyama.ac.jp)

E-mail address of the other authors

Michiko Shigyo: [d1361304@ems.u-toyama.ac.jp](mailto:d1361304@ems.u-toyama.ac.jp)

Tomoharu Kuboyama: [kuboyama@inm.u-toyama.ac.jp](mailto:kuboyama@inm.u-toyama.ac.jp)

Yusuke Sawai: ysawa368@inm.u-toyama.ac.jp

Masahito Tada-Umezaki: masume@inm.u-toyama.ac.jp

## **Supplemental Methods**

### ***Measurement of neuronal cell density***

The cultured neurons at 1 day *in vitro* were treated with 10, 100 or 200 ng/ml vimentin (ProSpec, Rehovot, Israel) or 1, 5, 10 or 100 ng/ml IGF1 (Wako). In addition, the cells were treated with or without 2 µg/ml IGF1R-neutralising antibody (R&D Systems, MS, USA) with or without 20 µg/ml IGF1 analogue (BACHEM, Bubendorf, Switzerland) for 15 min. Then, 100 µg/ml vimentin or 10 µg/ml IGF1 was added. After 6 days of treatment, the cells were fixed with 4% paraformaldehyde and immunostained with a mouse anti-phosphorylated neurofilament-H (pNF-H) monoclonal antibody (clone: SMI-35, dilution 1:500; Covance, Emeryville, CA, USA) as an axonal marker and a rabbit anti-microtubule associated protein 2 (MAP2) polyclonal antibody (dilution 1:1000, Abcam, Cambridge, United Kingdom) as a neuronal marker. Alexa Fluor 594-conjugated goat anti-mouse IgG (dilution 1:200; Invitrogen) and Alexa Fluor 488-conjugated goat anti-rabbit IgG (dilution 1:200; Invitrogen) were used as secondary antibodies. Neurons were counterstained with DAPI (Enzo Life Sciences, Farmingdale, NY, USA). Fluorescent images were captured using a fluorescent microscopy system (BX-61/DP70, Olympus, Tokyo, Japan) at 640 µm×850 µm. MAP2-positive neuronal cells in each photo were counted by using imageJ software.

### ***Cell viability Assay***

Cerebral cortical neurons were isolated from E14 mouse embryos and plated in poly-D-lysine coated 96-well plate at  $2 \times 10^4$  cells/well in the Neurobasal medium (Invitrogen) contained 12% horse serum, 0.6 % D-glucose and 2 mM L-glutamine for 5 hs, then the medium was changed to Neurobasal medium containing 2 % B-27 supplement, 0.6 % D-

glucose and 2 mM L-glutamine. At four days *in vitro*, media was replaced with the Neurobasal medium containing vimentin (1 to 200 ng/ml) or IGF1 (1 to 100 ng/ml). By using the CellTiter-Glo<sup>®</sup> (Promega), luminescent levels of survival cells were measured.

## Results

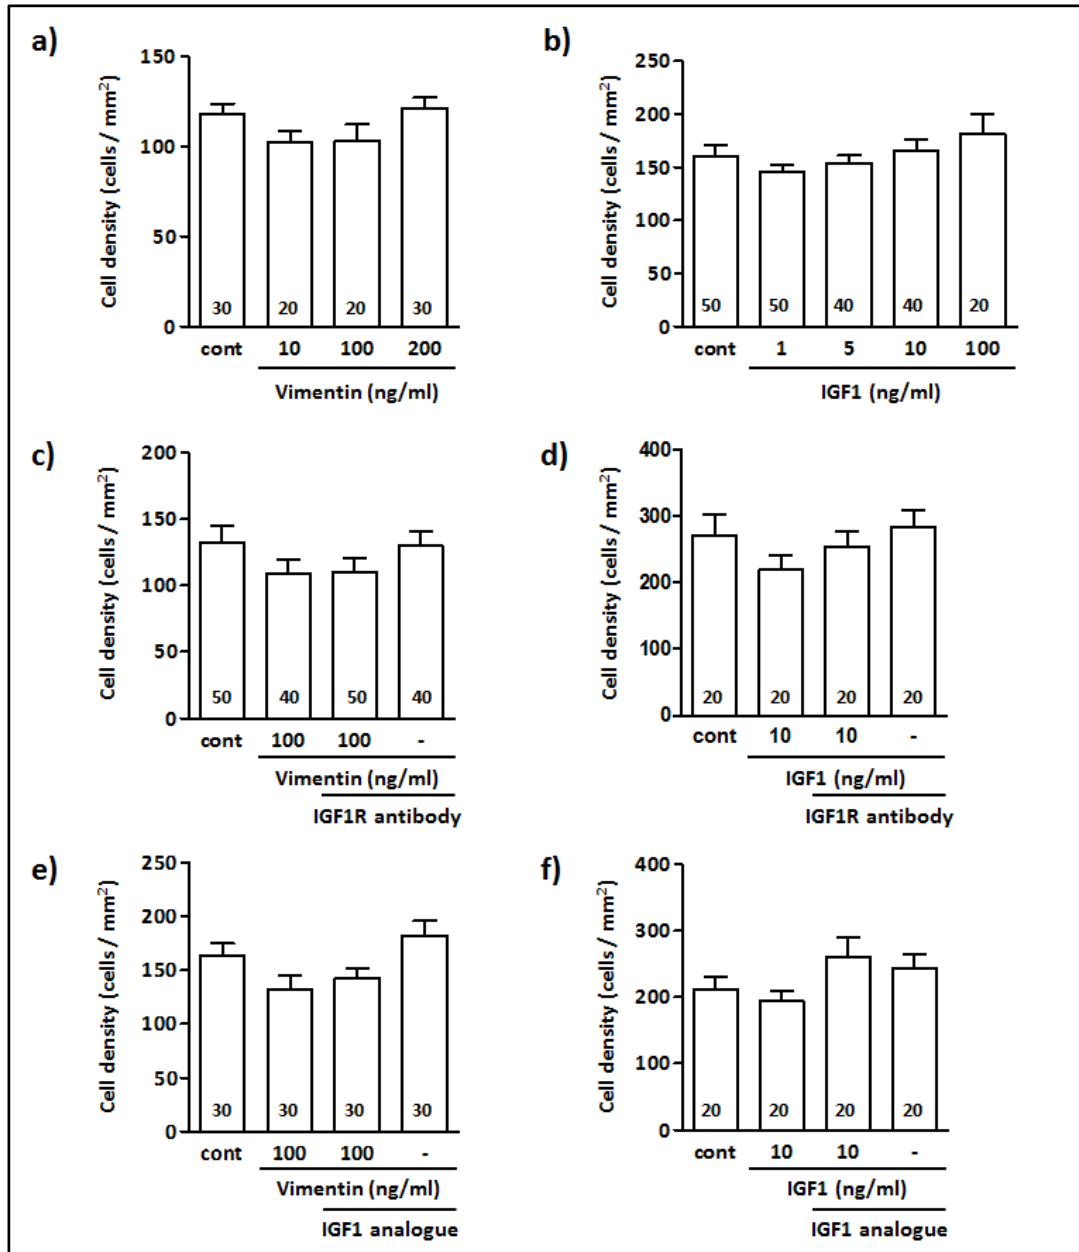

### Supplementary Figure S1

Primary cultured cortical neurons at 1 day *in vitro*, vimentin (10, 100, 200 ng/ml) or IGF1 (1, 5, 10, 100 ng/ml) was treated following 15 minutes pretreatment with IGF1R neutralizing antibody (2  $\mu$ g/ml) or IGF1 analogue (20  $\mu$ g/ml). At 6 days after treatment, cells were fixed and immunostained with MAP2, and counter stained with DAPI. The number of column indicates number of photos.

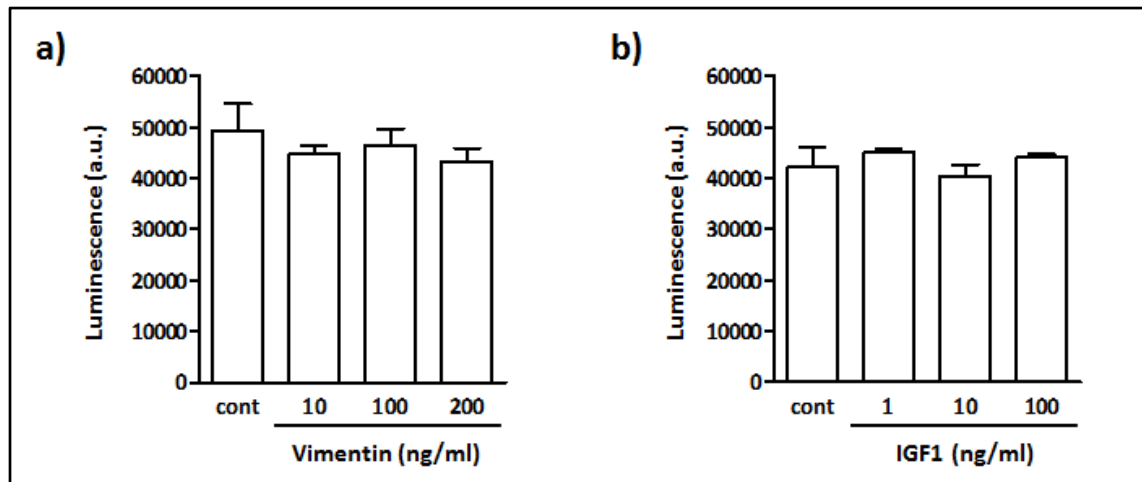

### Supplementary Figure S2

Primary cultured cortical neurons at 4 days *in vitro*, vimentin (10, 100, 200 ng/ml) or IGF1 (1, 10, 100 ng/ml) was treated for 24 h, and then the luminescent signals of survival cells were detected by using CellTiter-Glo<sup>®</sup> reagent. At 5 days *in vitro*, the number of neuronal cells was not significantly changed between groups.
